# Supplementary material
Source: PubMed Central journal article supplement (PMC539178)
Supplement: mbc_E04-05-0369_1.pdf [file mbc_E04-05-0369_1.pdf]

## HEK293T

|         |   |   |   |   |   |
|---------|---|---|---|---|---|
| Insulin | - | + | + | - | - |
| EGF     | - | - | - | + | + |
| DPI     | - | - | + | - | + |

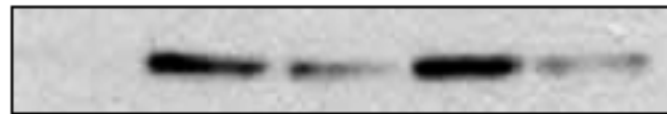

Blot : Anti-Phospho Akt (Ser473)

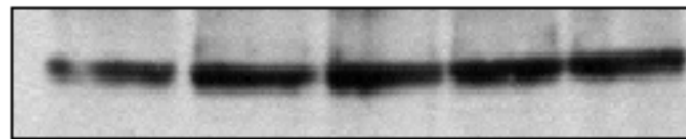

Blot : Anti-Akt

# U87MG

Control Insulin EGF H<sub>2</sub>O<sub>2</sub>

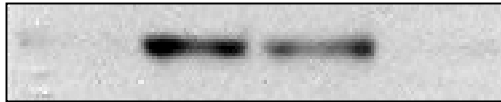

Blot : Anti-Phospho Akt (Ser473)

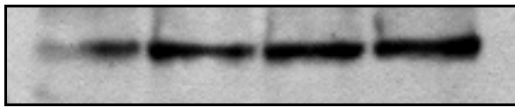

Blot : Anti-Akt

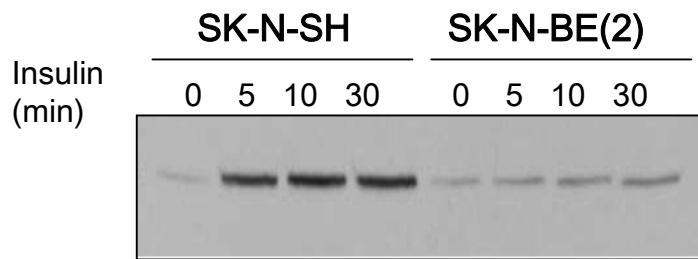

Blot : Anti-Phospho Akt (ser473)

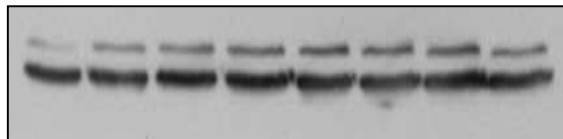

Blot : Anti-Akt

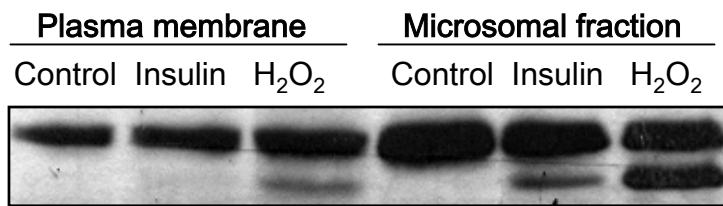

Blot : Anti-PTEN
